# Supplementary material
Source: HighWire-hosted journal article supplement (https://jnm.snmjournals.org/highwire/filestream/95126/field_highwire_adjunct_files/0/190827_Supplemental_Data.pdf)
Supplement: 190827_Supplemental_Data.pdf [file 190827_Supplemental_Data.pdf]

| <b>Staging category</b>  | <b>Region</b>                                                                                                                                          |
|--------------------------|--------------------------------------------------------------------------------------------------------------------------------------------------------|
| Local tumor presence (T) | Judgment on sextant base for patients without prior prostatectomy / prostate bed after prostatectomy                                                   |
| Lymph node staging (N)   | Inguinal<br>Pelvic right/left<br>Presacral/mesorectal<br>Retroperitoneal<br>Thoracic/axillary<br>Cervical                                              |
| Bone staging (Mb)        | Lower extremity right/left<br>Pelvis<br>Lumbar/thoracic/cervical spine<br>Sternum<br>Shoulder girdle right/left<br>Upper extremity right/left<br>Skull |
| Organ staging (Mc)       | Liver<br>Lung<br>Adrenal gland<br>Other visceral metastases<br>Soft-tissue<br>Brain                                                                    |

**Supplemental Table 1. List of predefined regions for prostate cancer assessment.**
